# Supplementary material for: Regulation of ABI5 expression by ABF3 during salt stress responses in Arabidopsis thaliana
Source: PubMed Central journal article supplement (PMC6689043; doi:10.1186/s40529-019-0264-z), 2019-08-09
Supplement: 40529_2019_264_MOESM2_ESM.pdf [file 40529_2019_264_MOESM2_ESM.pdf]

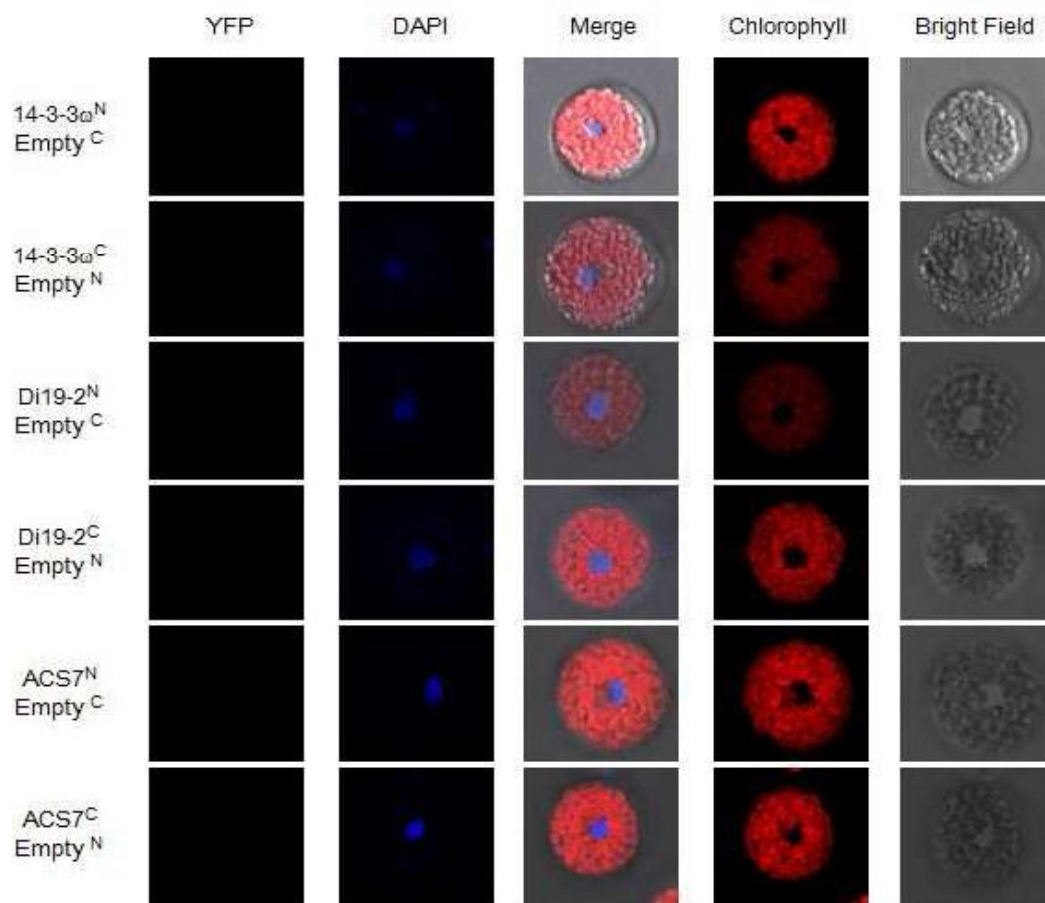

**Additional file 2.** Negative controls for the bimolecular fluorescence complementation analysis.
