# Supplementary material for: Regulation of ABI5 expression by ABF3 during salt stress responses in Arabidopsis thaliana
Source: PubMed Central journal article supplement (PMC6689043; doi:10.1186/s40529-019-0264-z), 2019-08-09
Supplement: 40529_2019_264_MOESM3_ESM.pdf [file 40529_2019_264_MOESM3_ESM.pdf]

|            |   |   |   |   |   |   |   |   |
|------------|---|---|---|---|---|---|---|---|
| CPK3-6His  |   |   |   |   |   |   |   |   |
| ACA2-MT    | - | + | - | - | - | - | - | - |
| ABF3       | - | - | + | - | - | - | - | - |
| ABF3-P1    | - | - | - | + | - | - | - | - |
| ABF3-P1 MT | - | - | - | - | + | - | - | - |
| ABF3-P3    | - | - | - | - | - | + | - | - |
| ABF3-P3 MT | - | - | - | - | - | - | + | - |
| ABF3-P4    | - | - | - | - | - | - | - | + |
| ABF3-P4 MT | - | - | - | - | - | - | - | + |

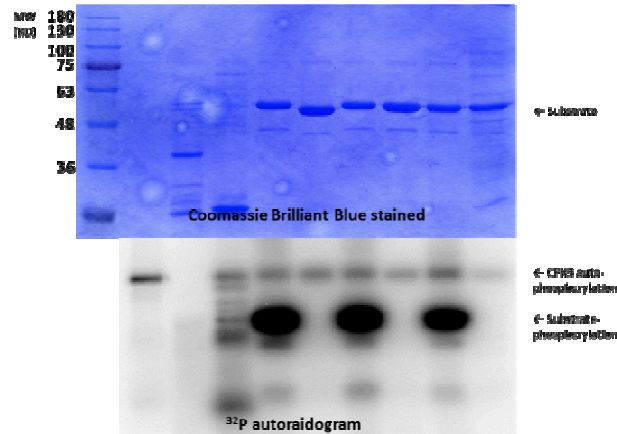

|             |   |   |   |   |   |   |   |   |
|-------------|---|---|---|---|---|---|---|---|
| CPK16-6His  | + | + | + | + | + | + | + | + |
| Di19-2-2-MT | - | + | - | - | - | - | - | - |
| ABF3        | - | - | + | - | - | - | - | - |
| ABF3-P1     | - | - | - | + | - | - | - | - |
| ABF3-P1 MT  | - | - | - | - | + | - | - | - |
| ABF3-P3     | - | - | - | - | - | + | - | - |
| ABF3-P3 MT  | - | - | - | - | - | - | + | - |
| ABF3-P4     | - | - | - | - | - | - | - | + |
| ABF3-P4 MT  | - | - | - | - | - | - | - | + |

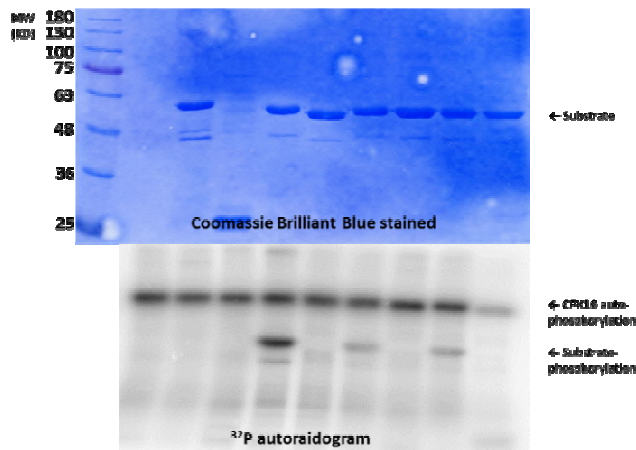

**Additional file 3.** The *in vitro* kinase assay of GST-ABF3 phosphorylated by mutated GST-CDPK16-6His. Recombinant fusion peptides ABF3 P1 [ (LQRQGpSLpTLPR), ABF3 P1 MT (LQRQGpSLALPR), ABF3 P3 (LPRTIpSQRVD), ABF3 P3 MT (LPRTIAQKRVD), ABF3 P4 (QCLRRTLpTGPW) and ABF3 P4 MT (QCLRRTLpAGPW) ] were used as substrates, and two recombinant kinases (AtCDPK16-6His, AtCDPK3-6His) were used to perform the kinase assay *in vitro*.
