# Supplementary material for: Regulation of ABI5 expression by ABF3 during salt stress responses in Arabidopsis thaliana
Source: PubMed Central journal article supplement (PMC6689043; doi:10.1186/s40529-019-0264-z), 2019-08-09
Supplement: 40529_2019_264_MOESM4_ESM.pdf [file 40529_2019_264_MOESM4_ESM.pdf]

| <i>cis</i> -element | Region      | Sequences                                |
|---------------------|-------------|------------------------------------------|
| W box               | -1046~-1051 | AGACAAAAGAT <b>TTGACCT</b> TCACGCCTCTC   |
| ABRE<br>(BOX2)      | -1154~-1161 | ACGTGCAGGAC <b>CACGTGTC</b> GTCCGCAGCCGA |
| ABRE<br>(BOX3)      | -1167~-1172 | GCCGAAGTCAC <b>CACGTGTC</b> GAGCCTGTGAGA |
| ABRE<br>(BOX4)      | -1211~-1218 | GCCGAAGTCAC <b>CACGTGTC</b> GAGCCTGTGAGA |
| W box               | -1462~-1467 | TGTTTACAAACT <b>TTGACT</b> ATTTCTTTCATA  |
| ABRE<br>(BOX5)      | -1689~-1694 | CAGTGAATAGT <b>CCACGTG</b> CACTCCCAATGG  |

*cis*-element of ABREs or W-boxes are in bold face.

**Additional file 4.** The predicted ABRE *cis*-elements in *ABI5* promoter sequence (-1 to -2055).
